# Supplementary material for: A simple way to achieve bioinspired hybrid wettability surface with micro/nanopatterns for efficient fog collection
Source: Royal Society of Chemistry journal article supplement (doi:10.1039/c7nr05683d), 2017-01-01
Supplement: c7nr05683d1.pdf [file c7nr05683d1.pdf]

## Supplementary information

### **A simple way to achieve bioinspired hybrid wettability surface with micro/nanopatterns for efficient fog collection**

Kai Yin<sup>a,b</sup>, Haifeng Du<sup>b</sup>, Xinran Dong<sup>b</sup>, Cong Wang<sup>b</sup>, Ji-An Duan<sup>\*b</sup>, and Jun He<sup>\*a</sup>

*<sup>a</sup>Hunan Key Laboratory of Super Microstructure and Ultrafast Process, School of Physics and Electronics,*

*Central South University, Changsha, 410083, China*

*<sup>b</sup>The State Key Laboratory of High Performance and Complex Manufacturing, College of Mechanical and*

*Electrical Engineering, Central South University, Changsha 410083, China*

\*To whom correspondence should be addressed.

\*Corresponding author: duanjian@csu.edu.cn, junhe@csu.edu.cn

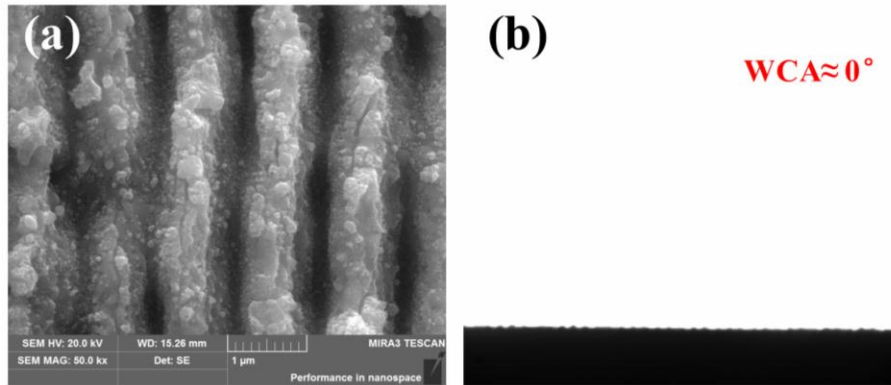

Fig. S1. (a) The SEM image of femtosecond laser direct fabricating the copper mesh without the PTFE sheet. (b) The wettability of a water droplet on the surfaces (a)

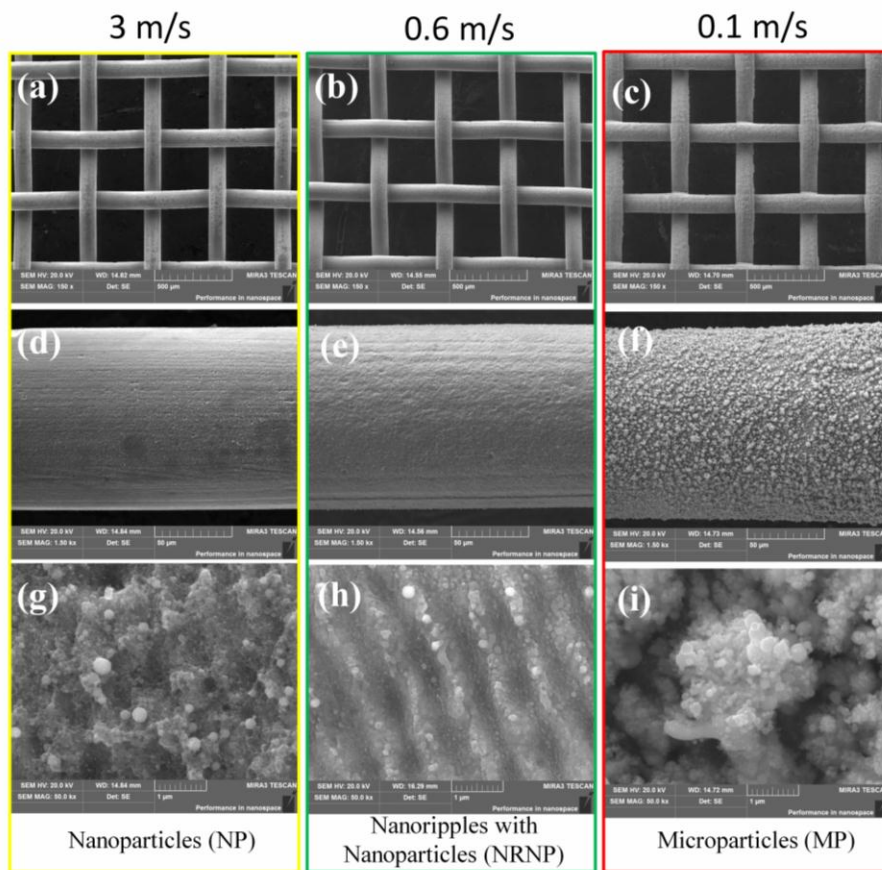

Fig. S2. SEM images of various femtosecond laser fabricated structures with different ablation parameters (scanning speed). The downsets are corresponding magnified SEM images. Laser power is fixed at 6W

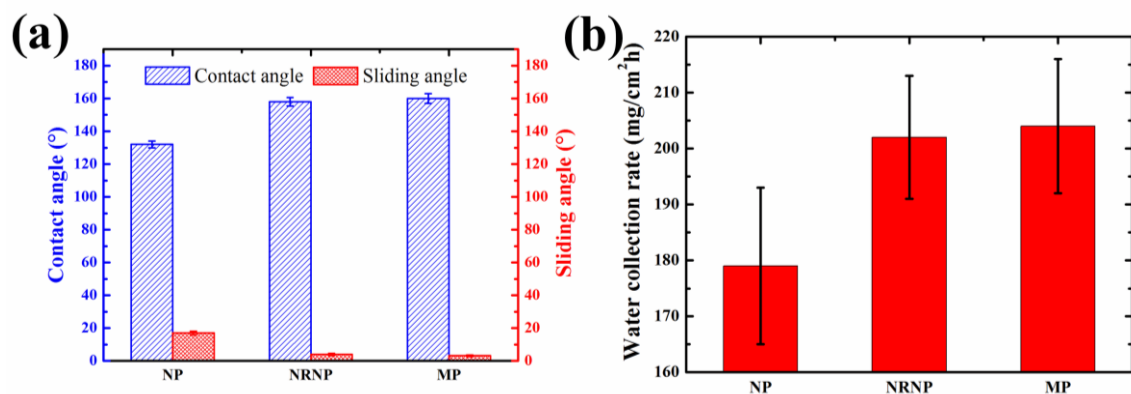

Fig. S3. (a) Contact angle and sliding angle of a water droplet on various femtosecond laser fabricated structures. (b) Water collection rates for the different femtosecond laser fabricated structures.

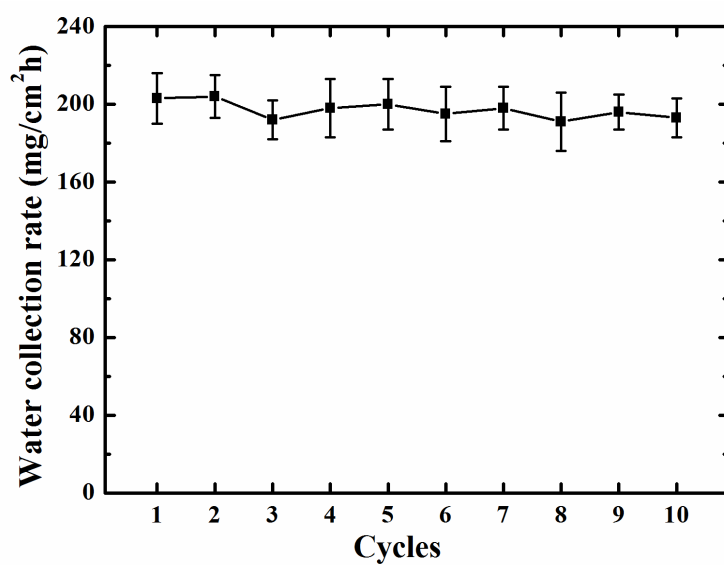

Fig. S4. Stability of the WCR on the as-prepared sample after 10 repeats of the fog-collecting process
